# Supplementary material
Source: MDPI journal article supplement (https://www.mdpi.com/2073-4344/10/7/748)
Supplement: s1 [file s1]

## *Supporting Information*

# Counteracting rapid catalyst deactivation by concomitant temperature increase during catalytic upgrading of biomass pyrolysis vapors using solid acid catalysts

***Andreas Eschenbacher<sup>1</sup>, Alireza Saraeian<sup>2</sup>, Brent H. Shanks<sup>2</sup>, Uffe Vie Mentzel<sup>3</sup>, Jesper Ahrenfeldt<sup>1</sup>, Ulrik Birk Henriksen<sup>1</sup>, and Anker Degn Jensen<sup>1,\*</sup>***

<sup>1</sup>Department of Chemical and Biochemical Engineering, Technical University of Denmark, 2800 Kgs. Lyngby, Denmark

<sup>2</sup>Department of Chemical and Biological Engineering, Iowa State University, Ames, IA 50011, United States

<sup>3</sup>Haldor Topsøe A/S, 2800 Kgs. Lyngby, Denmark

\*Correspondence: aj@kt.dtu.dk

The supporting information consists of 3 pages and 3 figures.

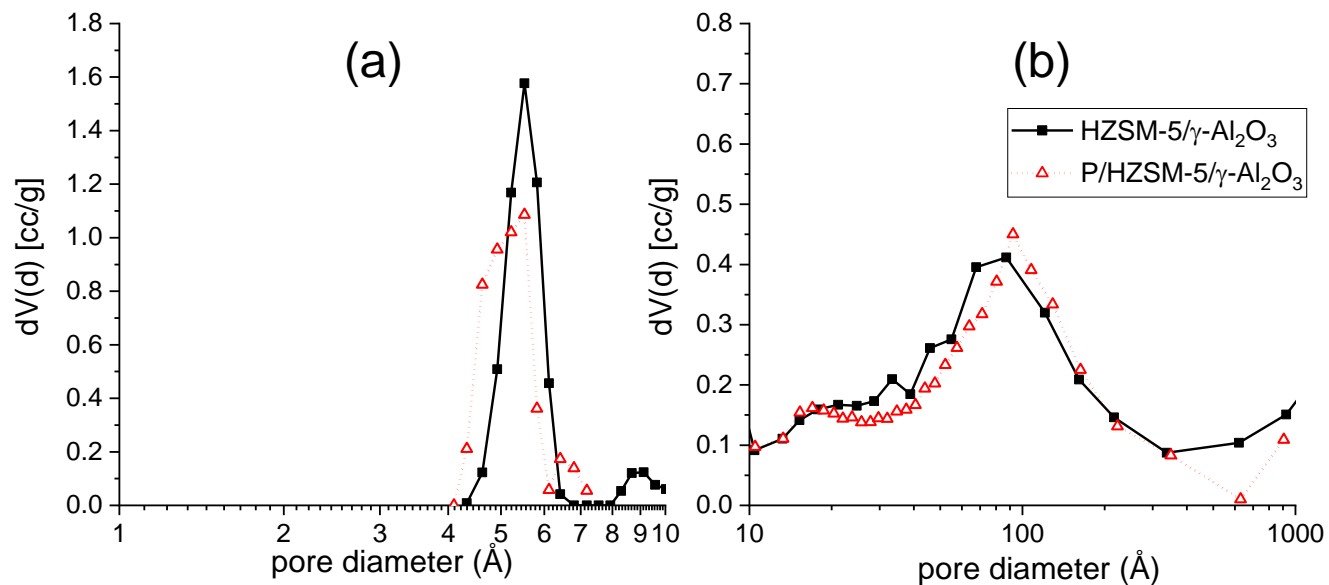

**Fig. S1.** (a) Pores size distribution of micropores, obtained from applying NL-DFT model to adsorption branch of argon physisorption isotherm. (b) Pores size distribution of mesopores, obtained from applying BJH model to adsorption branch of nitrogen physisorption isotherm.

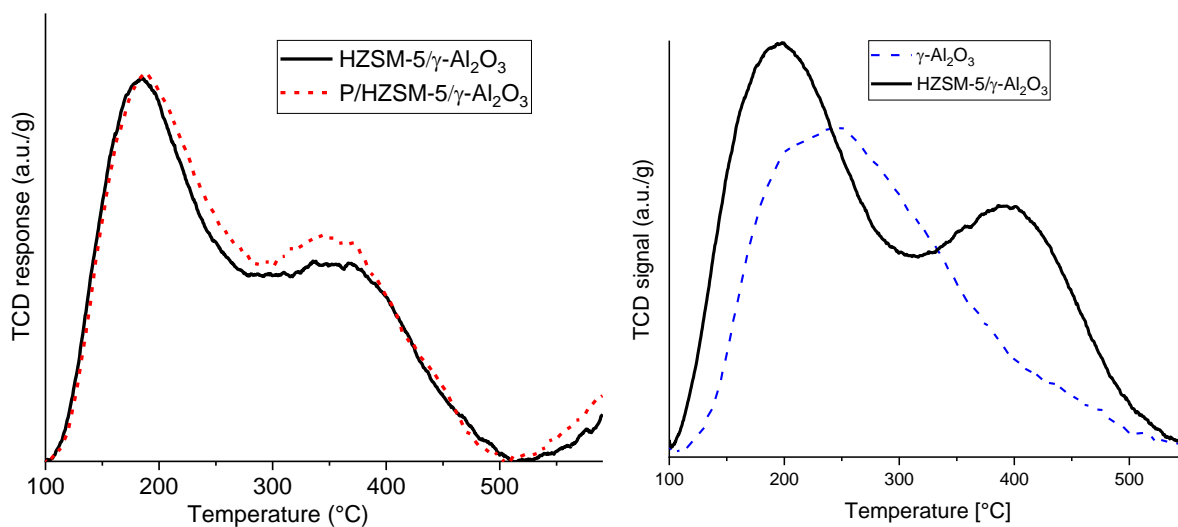

**Fig. S2.** NH<sub>3</sub>-TPD characterization of catalysts.

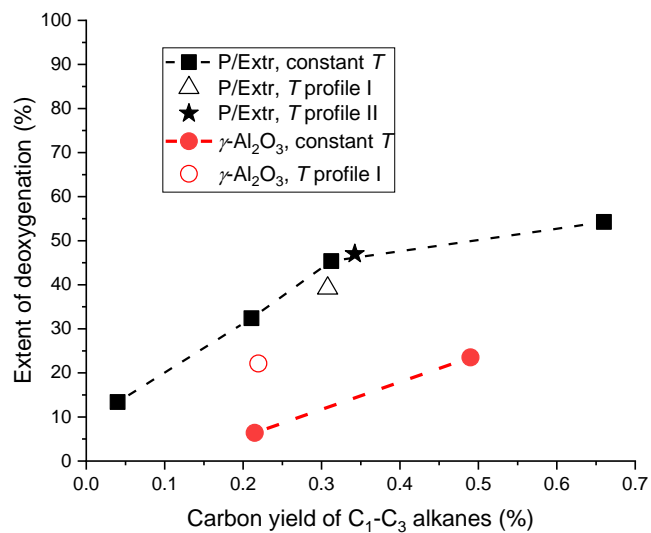

**Fig. S3.** Correlation of carbon yield of C<sub>1</sub>-C<sub>3</sub> alkanes with extent of deoxygenation

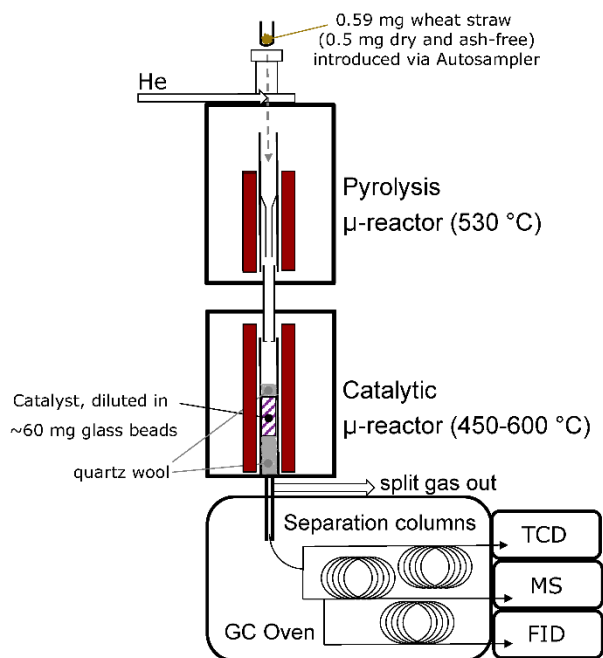

**Fig. S4.** Schematic of tandem micropyrolyzer-GC-MS/FID/TCD. Cups with biomass were introduced via auto-sampler. Flowrate was 60 ml/min He.
